# Supplementary material
Source: HighWire-hosted journal article supplement (https://jitc.bmj.com/content/10/6/e004493)
Supplement: inline-supplementary-material-4 [file inline-supplementary-material-4.pdf]

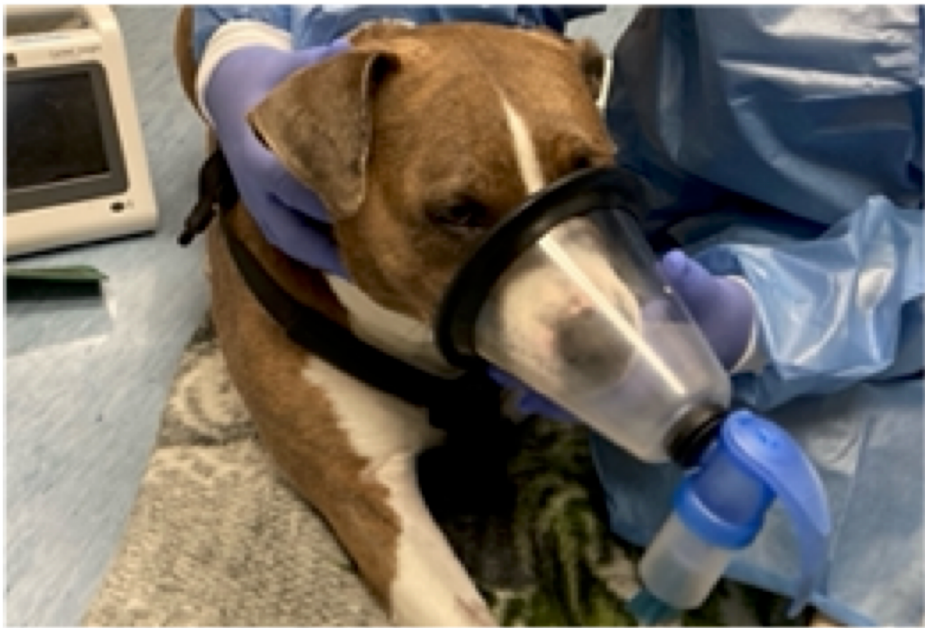

**Supplemental Figure 1. Administration of inhaled rhIL-15.** Representative image showing mechanics of administration for inhaled rhIL-15 using a nebulizer attached to a fitted veterinary anesthesia cone placed over the patient’s muzzle. Owners were instructed to perform treatments twice daily, a minimum of 8 hours apart, and a treatment log was sent home to be completed by all owners. Treatments lasted approximately 10 minutes each.
