# Supplementary material
Source: HighWire-hosted journal article supplement (https://jitc.bmj.com/content/10/6/e004493)
Supplement: inline-supplementary-material-6 [file inline-supplementary-material-6.pdf]

**Supplemental Table 2.** Patient demographics and clinical outcomes from pilot trial of palliative radiotherapy, allogeneic natural killer cell adoptive transfer, and subcutaneous rhIL-15 for unresectable canine melanoma.

| Patient ID | Dose (ug) | Weight (kg) | Age (years) | Sex <sup>†</sup> | Disease  | Breed            | VCOG-CAE Dose limiting toxicity |
|------------|-----------|-------------|-------------|------------------|----------|------------------|---------------------------------|
| 1          | 3         | 34.7        | 9.5         | F                | Melanoma | Labrador         | none <sup>‡</sup>               |
| 2          | 3         | 39.0        | 11.3        | M                | Melanoma | Golden Retriever | none                            |
| 3          | 3         | 10.0        | 13.9        | M                | Melanoma | Pug              | none                            |
| 4          | 3         | 32.0        | 7.1         | F                | Melanoma | Airedale         | none                            |
| 5          | 3         | 25.0        | 12.3        | F                | Melanoma | Standard Poodle  | none                            |

<sup>†</sup>Includes 1 castrated male and 3 spayed females  
<sup>‡</sup>patient experienced grade 2 fevers requiring antipyretics and outpatient observation x1 week  
Evaluation for response limited by concomitant administration of palliative radiotherapy
